# Supplementary material for: Regulation of the mammalian maternal-to-embryonic transition by eukaryotic translation initiation factor 4E
Source: PubMed Central journal article supplement (PMC8254863; doi:10.1242/dev.190793), 2021-06-25
Supplement: develop-148-190793-s1.pdf [file develop-148-190793-s1.pdf]

Fig S1

A. the results of insertion cite

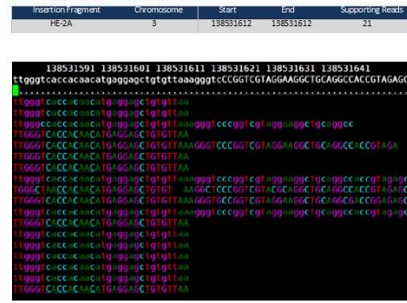

B. SOAPdenovo analyzed the results of insertion cite

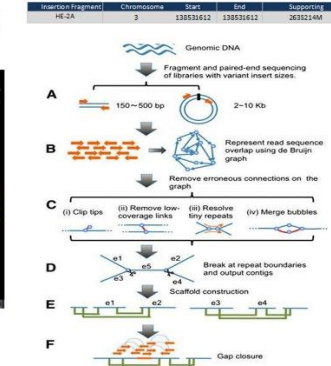

Fig. S1. Analysis of PB[Act-RFP] insertion by sequencing of *Eif4e*<sup>-/-</sup> mouse genome

DNA was extracted from transgene mouse (*Eif4e*<sup>-/-</sup>) peripheral blood. its concentration was detected using Qubit™ Flex Fluorometer and genome integrity was detected using agarose gel electrophoresis. Qualified DNA were submitted to BGI (Shenzhen, China) for library preparation and sequencing on BGISEQ-500 platform. A total 211G clean data was obtained with a 75X average depth. BWA (version 0.7.17-r1188) with MEM was used to

align sequence reads, clone sequences and assembly contigs to reference mm38 to create sequence alignment/map (SAM) format, giving rise to an average 99.75% mapping ratio. Samtools was used to select high quality mapped reads with mapQ value >30 for insertion site analysis.

After alignment of soft clip reads and pair end reads to reference genome and compare with average library size, the aligned sites of soft clip reads with the supporting number greater than 2 were recognized to be insertion sites. Only one insertion cite was found on Chromosome 3, 138531612 (A). Furthermore, with SOAPdenovo reads were assembled to find the sites where insertion was assembled. The results also showed an unique cite of insertion on Chromosome 3, 138531612 (B).

Fig S2

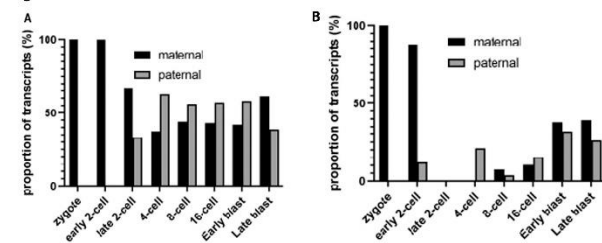

Fig. S2. Allelic source of *Eif4e* transcripts across each stage of development of the mouse embryo.

(A) The proportion (%) of all reads that could be assigned to one or other of the parental alleles. Source data is in supplementary DATA 1. (B) The proportion of individual cells (%) at each stage of where detected transcripts came exclusively from one or other of the parental alleles.

Table S1. The structure of PB[Act-RFP]

[Click here to download Table S1](#)

Table S2. The number of embryos and RFP+ embryos in developmental landmarks

|                                                               | No. of Mating female | No. of virginal plug | Zygotes      |       | 2-cell embryo |              | 4-8 cell embryo |            |              |       |            |
|---------------------------------------------------------------|----------------------|----------------------|--------------|-------|---------------|--------------|-----------------|------------|--------------|-------|------------|
|                                                               |                      |                      | Mean ± S.E.M | total |               | Mean ± S.E.M | total           |            | Mean ± S.E.M | total |            |
|                                                               |                      |                      |              | No    | RFP+          |              | No              | RFP+       |              | No    | RFP+       |
| <i>Eif4e</i> <sup>-/-</sup> ♂ × <i>Eif4e</i> <sup>+/-</sup> ♀ | 90                   | 37 (31.1%)*          | 15.4 ± 1.1   | 202   | 96 (47.5%)    | 12.7 ± 0.8** | 151             | 0 (0%)     | 11.9 ± 1.4*  | 64    | 44 (68.8%) |
| <i>Eif4e</i> <sup>+/-</sup> ♂ × <i>Eif4e</i> <sup>+/-</sup> ♀ | 25                   | 23 (92.0%)           | 16.3 ± 0.8   | 147   | 72 (49%)      | 15.8 ± 1.1   | 110             | 58 (52.3%) | 16.3 ± 0.9   | 134   | 65 (48.5%) |
| <i>Eif4e</i> <sup>-/-</sup> ♂ × <i>Eif4e</i> <sup>+/-</sup> ♀ | 29                   | 25 (86.2%)           | 16.2 ± 1.1   | 80    | 0 (0%)        | 16.1 ± 0.9   | 81              | 0 (0%)     | 16.1 ± 1.3   | 90    | 72 (40.0%) |
| <i>Eif4e</i> <sup>+/-</sup> ♂ × <i>Eif4e</i> <sup>+/-</sup> ♀ | 20                   | 18 (90%)             | 20.2 ± 0.8   | 165   | NA            | 18.3 ± 0.6   | 183             | NA         |              |       | NA         |

Discovering plugs in female virginals indicate fertilization. Its rate, the number of embryos and RFP+ embryos were shown in several developmental stages that freshly collected from female reproductive tracts. \*p<0.001 and \*\*p<0.01, compared to the according to *Eif4e*<sup>+/-</sup> ♂ × *Eif4e*<sup>+/-</sup> ♀ mating or *Eif4e*<sup>+/-</sup> ♂ × *Eif4e*<sup>+/-</sup> ♀ mating and *Eif4e*<sup>+/-</sup> ♂ × *Eif4e*<sup>+/-</sup> ♀.

**Table S3. Allelic source of Eif4e transcripts across each stage of development of the mouse embryo**

[Click here to download Table S3](#)
